# Supplementary material for: Gold nanoparticle-based colorimetric and electrochemical sensors for the detection of illegal food additives
Source: PubMed Central journal article supplement — J Food Drug Anal. 2020 Dec 1;28(4):641–53. doi: 10.38212/2224-6614.3114 (PMC9261815; doi:10.38212/2224-6614.3114), 2020-12-01
Supplement: jfda-28-04-641-s001.pdf [file jfda-28-04-641-s001.pdf]

## **Research Highlights**

1 This review deals with gold nanoparticle-based colorimetric and electrochemical sensors developed in the past five years.

2 Application of gold nanoparticle-based colorimetric sensors in detection of illegal food additives is summarized.

3 Detection of common illegal additives using gold nanoparticle-based electrochemical sensors is discussed in detail.

4 Current challenges and future potential developments are discussed briefly.
